# Supplementary material for: Epidemiology and Outcomes of Children with Kidney Failure Receiving Kidney Replacement Therapy in Australia and New Zealand
Source: PubMed Central journal article supplement — Kidney Int Rep. 2023 Jul 22;8(10):1951–64. doi: 10.1016/j.ekir.2023.07.006 (PMC10577490; doi:10.1016/j.ekir.2023.07.006), 2023-07-22
Supplement: mmc1.pdf [file mmc1.pdf]

## Supplementary Tables

Table S1. Failures, death, and dialysis modality changes at the first KRT modality: Australia and New Zealand Registry 2000–2020

| <b>Initial KRT Modality (n)</b> | <b>Technique failure or graft failure at first KRT</b> | <b>Death at first KRT modality</b> | <b>First dialysis modality change, then back to the first dialysis modality</b> | <b>KT as the second modality</b> | <b>KT as the &gt;2<sup>nd</sup> modality</b> | <b>Never received KT until end of study period</b> | <b>Died without receiving KT</b> |
|---------------------------------|--------------------------------------------------------|------------------------------------|---------------------------------------------------------------------------------|----------------------------------|----------------------------------------------|----------------------------------------------------|----------------------------------|
| PD (509)                        | 102                                                    | 18                                 | 46                                                                              | 332                              | 93                                           | 84                                                 | 28                               |
| HD (360)                        | 135                                                    | 11                                 | 21                                                                              | 187                              | 114                                          | 59                                                 | 27                               |
| KT (189)                        | 41                                                     | 3                                  | N/A                                                                             | N/A                              | N/A                                          | N/A                                                | N/A                              |
| Total (1058)                    | 278                                                    | 32                                 | 67                                                                              | 519                              | 207                                          | 143                                                | 55                               |

*HD*, hemodialysis; *KRT*, kidney replacement therapy; *KT*, kidney transplantation; *N/A*, not available; *PD*, peritoneal dialysis

Table S2. Death rates on the first KRT modality

| First<br>KRT Modality | Death Rate (per 100 patient-years) |                |                | P<br>comparing<br>decades |
|-----------------------|------------------------------------|----------------|----------------|---------------------------|
|                       | 2000–2020                          | 2000–2010      | 2011–2020      |                           |
| Overall               | 1.2 (0.8–1.6)                      | 1.2 (0.8–1.8)  | 1.1 (0.6–2)    | 0.9                       |
| Dialysis              | 2.3 (1.6–3.3)*                     | 2.4 (1.5–3.8)* | 2.2 (1.2–3.9)* | 0.9                       |
| Pre-emptive KT        | 0.2 (0.1–0.6)*                     | 0.3 (0.1–0.9)* | 0*             | 0.2                       |

*KT*, kidney transplantation; *KRT*, kidney replacement therapy

P value comparing pre-emptive KT with dialysis < 0.05

\*statistically significant

Table S3. Cause of death on the first KRT modality among pediatric KRT patients: Australia and New Zealand Registry 2000–2020

| Last KRT modality | Cause of death |            |        |           |       | Total |
|-------------------|----------------|------------|--------|-----------|-------|-------|
|                   | Cardiovascular | Withdrawal | Cancer | Infection | Other |       |
| PD                | 8              | 0          | 1      | 6         | 3     | 18    |
| HD                | 7              | 1          | 0      | 0         | 3     | 11    |
| KT                | 0              | 0          | 1      | 1         | 1     | 3     |
| Total             | 15             | 1          | 2      | 7         | 7     | 32    |

*HD*, hemodialysis; *KRT*, kidney replacement therapy; *KT*, kidney transplantation; *PD*, peritoneal dialysis

Table S4. Comparison of patient survival among children receiving KRT, stratified by the age at KRT initiation: Australia and New Zealand Registry 2000–2020

| Follow-up time (years) | Overall patient survival (95% CI) | < 1 year old        |                           | 1–4 years old       |                           | 5–9 years old       |                           | 10–14 years old     |                           | 15–18 years old     |                           |
|------------------------|-----------------------------------|---------------------|---------------------------|---------------------|---------------------------|---------------------|---------------------------|---------------------|---------------------------|---------------------|---------------------------|
|                        |                                   | N at risk in cohort | Patient survival (95% CI) | N at risk in cohort | Patient survival (95% CI) | N at risk in cohort | Patient survival (95% CI) | N at risk in cohort | Patient survival (95% CI) | N at risk in cohort | Patient survival (95% CI) |
| 0.5                    | 98 (96.9–98.7)                    | 80                  | 89.6 (81–94.5)            | 159                 | 98.2 (94.4–99.4)          | 209                 | 99 (96.2–99.8)            | 279                 | 98.9 (96.7–99.7)          | 294                 | 98.6 (96.4–99.5)          |
| 1                      | 96 (94.6–97.1)                    | 74                  | 79.5 (69–86.7)            | 152                 | 96.1 (91.6–98.2)          | 201                 | 97.6 (94.3–99)            | 267                 | 98.5 (96.2–99.5)          | 285                 | 97.2 (94.5–98.6)          |
| 2                      | 94.4 (92.7–95.7)                  | 60                  | 79.5 (69–86.7)            | 140                 | 95.3 (90.5–97.8)          | 188                 | 95.9 (91.9–97.9)          | 249                 | 97.7 (94.9–99)            | 265                 | 94.1 (90.5–96.3)          |
| 5                      | 91.4 (89.2–93.1)                  | 50                  | 75.4 (63.8–83.8)          | 106                 | 92.1 (85.4–95.7)          | 153                 | 94.4 (89.7–97)            | 197                 | 95.1 (91–97.4)            | 222                 | 90.1 (85.5–93.3)          |
| 10                     | 86.8 (83.7–89.4)                  | 27                  | 75.4 (63.8–83.8)          | 65                  | 88.3 (79.1–93.6)          | 99                  | 89.6 (82.4–94)            | 109                 | 87.1 (79.2–92.2)          | 146                 | 86.9 (81.2–90.9)          |
| 15                     | 85.4 (81.7–88.5)                  | 10                  | 75.4 (63.8–83.8)          | 30                  | 83.4 (67.9–91.8)          | 57                  | 86.9 (77–92.7)            | 50                  | 87.1 (79.2–92.2)          | 74                  | 86.9 (81.2–90.9)          |

*KRT*, kidney replacement therapy; *KT*, kidney transplantation; *N/A*, not available

Table S5. Time to death, cause of death, and number of KRT sequences, by age at KRT initiation

| Age at KRT Initiation (Years) | Number of Patients | Time to Death (Years) (median (IQR)) | Number of KRT Sequences before Death (median (IQR)) | Cause of death (n)                                                                                                                                                                                                                                                                                                                                            |
|-------------------------------|--------------------|--------------------------------------|-----------------------------------------------------|---------------------------------------------------------------------------------------------------------------------------------------------------------------------------------------------------------------------------------------------------------------------------------------------------------------------------------------------------------------|
| < 1                           | 19                 | 1 (0–1)                              | 3 (3–3)                                             | Cardiovascular (10)<br>Infection (septicaemia, respiratory, and UTI) (4)<br>Cerebrovascular (1)<br>Withdrawal (cardiovascular comorbidities, psychosocial reasons, and sclerosing peritonitis) (3)<br>Other (1)                                                                                                                                               |
| 1–4                           | 13                 | 3 (1–9)                              | 4 (4–7)                                             | Cardiovascular (3)<br>Infection (CNS, septicaemia, respiratory, and liver) (6)<br>Cerebrovascular (1)<br>Cancer (leukemia) (1)<br>Other (2)                                                                                                                                                                                                                   |
| 5–9                           | 15                 | 2 (1–14)                             | 5 (5–10)                                            | Cardiovascular (6)<br>Infection (septicaemia, CNS, and peritonitis) (3)<br>Cerebrovascular (1)<br>Cancer (1)<br>Withdrawal (cerebrovascular comorbid) (1)<br>Other (severe metabolic acidosis and multiple comorbidities) (3)                                                                                                                                 |
| 10–14                         | 17                 | 9 (3–11)                             | 5 (4–8)                                             | Cardiovascular (7)<br>Infection (septicaemia, respiratory, and peritonitis) (4)<br>Cancer (1)<br>Withdrawal (psychosocial) (1)<br>Other (chronic respiratory failure, cachexia, and vehicle accident) (4)                                                                                                                                                     |
| 15–18                         | 28                 | 3.5 (1–8)                            | 5 (4–7)                                             | Cardiovascular (14)<br>Infection (septicaemia and pancreatitis) (2)<br>Cerebrovascular (1)<br>Cancer (1)<br>Withdrawal (psychosocial and dialysis-access difficulties) (2)<br>Other (chronic respiratory failure, hepatic failure, multiple organ failure, poorly controlled diabetes, perforation of abdominal viscus, and intra operative air embolism) (8) |
| P                             |                    | 0.0016                               | <0.001                                              |                                                                                                                                                                                                                                                                                                                                                               |

*CNS*, central nervous system; *IQR*, inter quartile range; *KRT*, kidney replacement therapy; *UTI*, urinary tract infection

Table S6. Overall cause of death based on the last KRT modality among pediatric KRT patients: Australia and New Zealand Registry 2000–2020

| Death Age (years) | Cause of Death                                                                                                                   | Last KRT Modality |    |    |
|-------------------|----------------------------------------------------------------------------------------------------------------------------------|-------------------|----|----|
|                   |                                                                                                                                  | KT                | PD | HD |
| 0–4               | Cardiovascular                                                                                                                   | 0                 | 10 | 1  |
|                   | Infection (UTI, septicaemia, respiratory, liver, CNS)                                                                            | 2                 | 7  | 0  |
|                   | Withdrawal (psychosocial reasons, cardiovascular comorbidities, progression of disease)                                          | 1                 | 1  | 1  |
|                   | Other (multi-organ failure)                                                                                                      | 0                 | 0  | 1  |
| 5–8               | Cardiovascular                                                                                                                   | 0                 | 1  | 1  |
|                   | Infection (CNS)                                                                                                                  | 1                 | 0  | 0  |
|                   | Cerebrovascular                                                                                                                  | 0                 | 0  | 2  |
|                   | Withdrawal (sclerosing peritonitis, cerebrovascular comorbidities)                                                               | 0                 | 2  | 0  |
|                   | Other (severe metabolic acidosis)                                                                                                | 1                 | 0  | 0  |
| 9–14              | Cardiovascular                                                                                                                   | 0                 | 0  | 3  |
|                   | Infection (CNS, septicaemia, peritonitis)                                                                                        | 1                 | 4  | 0  |
|                   | Cerebrovascular                                                                                                                  | 0                 | 1  | 0  |
|                   | Cancer                                                                                                                           | 0                 | 1  | 0  |
| 15–18             | Cardiovascular                                                                                                                   | 2                 | 0  | 7  |
|                   | Cancer (leukemia)                                                                                                                | 2                 | 0  | 0  |
|                   | Other (multi-organ failure, chronic respiratory failure, poorly controlled diabetes, intra-operative air embolism, and accident) | 3                 | 2  | 1  |
| >18               | Cardiovascular                                                                                                                   | 0                 | 1  | 14 |
|                   | Infection (septicaemia, respiratory, pancreatitis)                                                                               | 0                 | 2  | 2  |
|                   | Cerebrovascular                                                                                                                  | 1                 | 0  | 0  |
|                   | Cancer                                                                                                                           | 1                 | 0  | 0  |
|                   | Withdrawal (dialysis access difficulties, psychosocial reasons)                                                                  | 0                 | 0  | 3  |
|                   | Other (chronic respiratory failure, perforation of abdominal viscus, hepatic failure, cachexia)                                  | 1                 | 0  | 8  |
|                   | Total                                                                                                                            | 16                | 32 | 44 |

*CNS*, central nervous system; *HD*, hemodialysis; *KRT*, kidney replacement therapy; *KT*, kidney transplantation; *PD*, peritoneal dialysis; *UTI*, urinary tract infection

Table S7. Comparison of patient survival among children receiving PD, HD, and KT on the first KRT modality: Australia and New Zealand Registry 2000–2020

| Follow-up time (years) | Overall patient survival (95% CI) | Peritoneal dialysis |                           | Hemodialysis        |                           | Log-rank P value (only dialysis) | Pre-emptive KT      |                           | Log-rank P value |
|------------------------|-----------------------------------|---------------------|---------------------------|---------------------|---------------------------|----------------------------------|---------------------|---------------------------|------------------|
|                        |                                   | N at risk in cohort | Patient survival (95% CI) | N at risk in cohort | Patient survival (95% CI) |                                  | N at risk in cohort | Patient survival (95% CI) |                  |
| 0.5                    | 99.1 (98.1–99.5)                  | 391                 | 98.5 (96.8–99.3)          | 171                 | 99.5 (96.8–99.9)          | 0.04                             | 180                 | 100                       | 0.01             |
| 1                      | 98.3 (97–99)                      | 275                 | 97.6 (95.5–98.7)          | 122                 | 98.7 (94.8–99.7)          | 0.2                              | 172                 | 99.4 (96–99.9)            | 0.13             |
| 2                      | 96.6 (94.6–97.8)                  | 110                 | 94.5 (90.4–96.9)          | 65                  | 97.5 (92–99.3)            | 0.3                              | 161                 | 98.8 (95.4–99.7)          | 0.29             |
| 5                      | 95.5 (93–97.1)                    | 22                  | 93.5 (88.8–96.3)          | 28                  | 93.2 (82.4–97.5)          | 0.5                              | 124                 | 98.8 (95.4–99.7)          | 0.25             |
| 10                     | 90.3 (85.1–93.8)                  | 5                   | 79.7 (52.7–92.3)          | 6                   | 62.9 (33.4–82.2)          | 0.6                              | 67                  | 98.8 (95.4–99.7)          | <0.001           |
| 15                     | 86.7 (78.2–92)                    | 3                   | 79.7 (52.7–92.3)          | 3                   | 50.3 (19.6–74.8)          | 0.7                              | 27                  | 95.7 (82.6–99)            | <0.001           |

*HD*, hemodialysis; *KRT*, kidney replacement therapy; *KT*, kidney transplantation; *PD*, peritoneal dialysis

Table S8. Patient survival among children staying on the first KRT modality, by decade

| Period / first KRT modality | Patient survival probability (95% CI) |                  |                  |                  |                  |
|-----------------------------|---------------------------------------|------------------|------------------|------------------|------------------|
|                             | 6 months                              | 1 year           | 2 years          | 5 years          | 10 years         |
| 2000–2010                   |                                       |                  |                  |                  |                  |
| Overall                     | 98.8 (97.2–99.5)                      | 98.5 (96.8–99.4) | 96.4 (93.3–98)   | 94.5 (90.4–96.8) | 89.5 (83–93.6)   |
| Peritoneal dialysis         | 97.7 (94.6–99.1)                      | 97.7 (94.6–99.1) | 94.4 (88.1–97.4) | 92.5 (84.7–96.5) | 79.3 (41.6–94.1) |
| Hemodialysis                | 100                                   | 100              | 98.2 (87.6–99.7) | 92.2 (76.8–97.5) | 65.9 (35.4–84.5) |
| Kidney transplant           | 100                                   | 98.8 (91.9–99.8) | 97.6 (90.8–99.4) | 97.6 (90.8–99.4) | 97.6 (90.8–99.4) |
| 2011–2020                   |                                       |                  |                  |                  |                  |
| Overall                     | 99.3 (97.8–99.8)                      | 98 (95.8–99)     | 96.9 (93.8–98.4) | 96.9 (93.8–98.4) | N/A              |
| Peritoneal dialysis         | 99.2 (96.7–99.8)                      | 97.4 (93.6–98.9) | 94.5 (87.6–97.6) | 94.5 (87.6–97.6) | N/A              |
| Hemodialysis                | 98.9 (92.3–99.8)                      | 96.8 (86.9–99.2) | 96.8 (86.9–99.2) | 96.8 (86.9–99.2) | N/A              |
| Kidney transplant           | 1                                     | 1                | 1                | 1                | N/A              |

*KRT*, kidney replacement therapy; *N/A*, not available



Table S9. Comparison of patient survival among children who commenced dialysis at age < 5 years old and ≥ 5 years old: Australia and New Zealand Registry 2000–2020

| Follow-up time (years) | Overall patient survival (aged 0–18 years old) (95% CI) | Commenced dialysis at age < 5 years old |                           | Commenced dialysis at age ≥ 5 years old |                           | Log-rank P value |
|------------------------|---------------------------------------------------------|-----------------------------------------|---------------------------|-----------------------------------------|---------------------------|------------------|
|                        |                                                         | N at risk in cohort                     | Patient survival (95% CI) | N at risk in cohort                     | Patient survival (95% CI) |                  |
| 0.5                    | 99.8 (97.6–99.4)                                        | 155                                     | 96.1 (91.9–98.1)          | 406                                     | 99.8 (98.6–100)           | <0.001           |
| 1                      | 97.9 (96.4–98.8)                                        | 124                                     | 95.4 (91.0–97.7)          | 274                                     | 98.8(96.8–99.6)           | <0.001           |
| 2                      | 95.5 (92.5–97.3)                                        | 54                                      | 89.4 (81.6–94.0)          | 121                                     | 98.2 (95.5–99.3)          | <0.001           |
| 5                      | 92.8 (87.5–95.9)                                        | 12                                      | 89.4 (81.6–94.0)          | 38                                      | 94.4 (86.8–97.7)          | <0.001           |
| 10                     | 69.2 (48.5–82.9)                                        | 2                                       | 44.7 (8.5–76.9)           | 9                                       | 76.9 (53.0–89.7)          | <0.001           |
| 15                     | 61.5 (37.7–78.5)                                        | 2                                       | 44.7 (8.5–76.9)           | 4                                       | 67.3 (38.4–84.9)          | <0.001           |

Table S10. Patient survival among children aged < 5 years old staying on the first dialysis modality, by decade

| Period           | Patient survival probability (95% CI) |                  |                  |                  |                  |
|------------------|---------------------------------------|------------------|------------------|------------------|------------------|
|                  | 6 months                              | 1 year           | 2 years          | 5 years          | 10 years         |
| 2000–2010        | 94.0 (86.1–97.5)                      | 94.0 (86.1–97.5) | 86.4 (73.0–93.4) | 86.4 (73.0–93.4) | 64.8 (19.4–89.2) |
| 2011–2020        | 98.0 (92.0–99.5)                      | 96.7 (90.0–98.9) | 92.0 (80.5–96.9) | 92.0 (80.5–96.9) | N/A              |
| Log rank P value | 0.9                                   | 0.4              | 0.2              | 0.2              | 0.4              |

N/A, not available

Table S11. Multivariable Cox proportional hazards analysis of mortality among children receiving dialysis modalities (PD and HD) as the first KRT: Australia and New Zealand Registry 2000–2020

| Parameter                               | Multivariable-adjusted hazard ratio (95% CI) for Australia only | Multivariable-adjusted hazard ratio (95% CI) for Australia and New Zealand |
|-----------------------------------------|-----------------------------------------------------------------|----------------------------------------------------------------------------|
| Period                                  |                                                                 |                                                                            |
| 2011–2020 vs. 2000–2010                 | 1.4 (0.5–4.1)                                                   | 1.0 (0.4–2.1)                                                              |
| Age at KRT                              |                                                                 |                                                                            |
| 0–4 vs. 10–14 years old                 | 10.3 (1.7–64.0)*                                                | 11.1 (2.2–56.5)*                                                           |
| 5–9 vs. 10–14 years old                 | 1.3 (1.0–16.7)                                                  | 1.1 (0.1–13.3)                                                             |
| 15–18 vs. 10–14 years old               | 4.2 (0.7–26.3)                                                  | 4.3 (0.8–21.7)                                                             |
| Gender                                  |                                                                 |                                                                            |
| Male vs. female                         | 0.4 (0.1–1.2)                                                   | 0.8 (0.4–1.8)                                                              |
| Ethnicity                               |                                                                 |                                                                            |
| Asian vs. Caucasian                     | 0.8 (0.2–4.7)                                                   | 0.6 (0.1–3.0)                                                              |
| ATSI* vs. Caucasian                     | 3.1 (0.7–13.8)                                                  | 3.6 (0.9–14.3)                                                             |
| <i>Māori</i> vs. Caucasian              | 19.0 (1.5–239.6)*                                               | 3.2 (0.7–13.5)                                                             |
| Pacific Islander vs. Caucasian          | 2.7 (0.3–27.1)                                                  | 0.9 (0.1–7.6)                                                              |
| Other vs. Caucasian                     | 1.6 (0.3–8.8)                                                   | 1.1 (0.2–5.0)                                                              |
| First KRT modality                      |                                                                 |                                                                            |
| Hemodialysis vs. PD                     | 0.7 (0.2–2.6)                                                   | 1.2 (0.4–3.4)                                                              |
| Primary kidney diseases                 |                                                                 |                                                                            |
| Cystic diseases vs. CAKUT               | 1.7 (0.4–7.7)                                                   | 1.2 (0.3–4.8)                                                              |
| Glomerulonephritis vs. CAKUT            | 0.5 (0.1–2.5)                                                   | 0.5 (0.2–1.6)                                                              |
| Others vs. CAKUT                        | 0.9 (0.3–3.2)                                                   | 0.6 (0.2–1.7)                                                              |
| Late referral                           | 1.8 (1.4–2.5)*                                                  | 1.0 (0.4–2.3)                                                              |
| Parent centre state                     |                                                                 |                                                                            |
| New Zealand vs. Australia               |                                                                 | 1.2 (0.3–4.1)                                                              |
| Socio economic indexes for Area (IRSAD) |                                                                 |                                                                            |
| Quartile 2 vs. quartile 1               | 0.7 (0.2–2.9)                                                   | N/A                                                                        |
| Quartile 3 vs. quartile 1               | 1.5 (0.4–5.9)                                                   | N/A                                                                        |
| Quartile 4 vs. quartile 1               | 0.7 (0.1–4.6)                                                   | N/A                                                                        |

|                                                     |                |     |
|-----------------------------------------------------|----------------|-----|
| Accessibility/Remoteness Index of Australia (ARIA), |                |     |
| Regional vs. major                                  | 1.4 (0.4–4.9)  | N/A |
| Remote vs. major                                    | 1.8 (0.2–15.6) | N/A |

*ATSI*, Aboriginal and Torres Strait Islander; *CAKUT*, congenital anomalies of the kidneys and urinary tract; *HD*, hemodialysis; *KRT*, kidney replacement therapy; *KT*, kidney transplantation; *N/A*, not available; *PD*, peritoneal dialysis

\*statistically significant

Data from New Zealand alone was too limited to be shown separately.

Table S12. Causes of technique failure in children with dialysis as the first KRT modality: Australia and New Zealand Registry 2000–2020

| PD                               | n (102) | HD                              | n (135) |
|----------------------------------|---------|---------------------------------|---------|
| Recurrent/persistent peritonitis | 23      | Geography                       | 1       |
| Acute peritonitis                | 19      | Vascular access                 | 3       |
| Tunnel/exit site infection       | 3       | Patient preference              | 26      |
| Inadequate solute clearance      | 16      | Planned transfer after acute HD | 46      |
| Inadequate fluid ultrafiltration | 6       | Other                           | 3       |
| Dialysate leak                   | 3       | No data                         | 56      |
| Catheter block                   | 7       |                                 |         |
| Hernia                           | 3       |                                 |         |
| Abdominal pain                   | 1       |                                 |         |
| Abdominal surgery                | 4       |                                 |         |
| Multiple adhesions               | 1       |                                 |         |
| Patient preference               | 4       |                                 |         |
| Unable to manage self            | 1       |                                 |         |
| Other surgery                    | 1       |                                 |         |
| Hydrothorax                      | 1       |                                 |         |
| Other                            | 3       |                                 |         |
| No data                          | 6       |                                 |         |

*HD*, hemodialysis; *KRT*, kidney replacement therapy; *PD*, peritoneal dialysis

Table S13. Death-censored technique survival among children receiving dialysis (PD and HD) as the first KRT modality: Australia and New Zealand Registry 2000–2020

| Follow-up time (years) | Overall technique survival (95% CI) | PD                  |                             | HD                  |                             | Log-rank P value |
|------------------------|-------------------------------------|---------------------|-----------------------------|---------------------|-----------------------------|------------------|
|                        |                                     | N at risk in cohort | Technique survival (95% CI) | N at risk in cohort | Technique survival (95% CI) |                  |
| 0.5                    | 79.7 (76.7–82.3)                    | 385                 | 91.3 (88.4–93.5)            | 168                 | 62.7 (57.3–67.7)            | <0.001           |
| 1                      | 74.9 (71.6–77.9)                    | 266                 | 85.2 (81.3–88.3)            | 120                 | 60.1 (54.4–65.2)            | <0.001           |
| 2                      | 65.1 (60.8–69)                      | 102                 | 70.9 (64.9–76)              | 64                  | 56.8 (50.7–62.4)            | <0.001           |
| 3                      | 58.5 (53.2–63.4)                    | 42                  | 59.7 (51.3–67.1)            | 48                  | 54.8 (48.3–60.8)            | <0.001           |
| 4                      | 52 (45.6–58)                        | 22                  | 47 (36.2–57.1)              | 36                  | 53.3 (46.4–59.8)            | <0.001           |
| 5                      | 49.9 (43.1–56.3)                    | 15                  | 41.6 (29.9–52.9)            | 27                  | 53.3 (46.4–59.8)            | <0.001           |
| 6                      | 49.9 (43.1–56.3)                    | 12                  | 41.6 (29.9–52.9)            | 21                  | 53.3 (46.4–59.8)            | <0.001           |
| 10                     | 42.2 (33.2–51)                      | 1                   | N/A                         | 5                   | 50.5 (41.9–58.5)            | <0.001           |

*HD*, hemodialysis; *KRT*, kidney replacement therapy; *N/A*, not available; *PD*, peritoneal dialysis

Table S14. Death-censored technique survival among children receiving dialysis (PD and HD) as the first KRT modality, by decade

| Period / first KRT modality | Technique survival probability (95% CI) |                  |                  |                  |                  |
|-----------------------------|-----------------------------------------|------------------|------------------|------------------|------------------|
|                             | 6 months                                | 1 year           | 2 years          | 5 years          | 10 years         |
| 2000–2010                   |                                         |                  |                  |                  |                  |
| Overall                     | 79.5 (75.3–83.0)                        | 74.1 (69.5–78.2) | 62.6 (56.8–68.0) | 48.3 (40.5–56.6) | 40.0 (29.6–50.1) |
| Peritoneal dialysis         | 91.9 (87.5–94.7)                        | 85.7 (80.1–89.8) | 67.3 (58.7–74.5) | 39.3 (24.9–53.4) | N/A              |
| Hemodialysis                | 63.6 (56.1–70.1)                        | 59.2 (51.5–66.1) | 56.2 (48.2–63.5) | 52.6 (43.5–60.9) | 49.3 (38.7–59.1) |
| 2011–2020                   |                                         |                  |                  |                  |                  |
| Overall                     | 79.9 (75.6–83.5)                        | 75.8 (71.0–80.0) | 68.3 (62.0–73.8) | 51.2 (39.1–62.0) | N/A              |
| Peritoneal dialysis         | 90.8 (86.3–93.9)                        | 84.6 (78.9–88.9) | 75.2 (66.9–81.7) | 45 (25.6–62.6)   | N/A              |
| Hemodialysis                | 61.9 (53.5–69.2)                        | 61.9 (53.5–69.2) | 58 (48.2–66.5)   | 54.9 (43.9–64.6) | N/A              |

*HD*, hemodialysis; *KRT*, kidney replacement therapy; *N/A*, not available; *PD*, peritoneal dialysis

Table S15. Non-censored for death technique survival among children receiving dialysis (PD and HD) as the first KRT modality: Australia and New Zealand Registry 2000–2020

| Follow-up time (years) | Overall technique survival (95% CI) | Peritoneal dialysis (PD) |                             | Hemodialysis (HD)   |                             | Log-rank P value |
|------------------------|-------------------------------------|--------------------------|-----------------------------|---------------------|-----------------------------|------------------|
|                        |                                     | N at risk in cohort      | Technique survival (95% CI) | N at risk in cohort | Technique survival (95% CI) |                  |
| 0.5                    | 78.7 (75.7–81.4)                    | 385                      | 89.9 (86.8–92.3)            | 168                 | 62.4 (57–67.4)              | <0.001           |
| 1                      | 73.3 (70–76.4)                      | 266                      | 83.1 (79.1–86.3)            | 120                 | 59.3 (53.6–64.5)            | <0.001           |
| 2                      | 62 (57.7–66.1)                      | 102                      | 66.8 (60.8–72.1)            | 64                  | 55.4 (49.2–61.1)            | <0.001           |
| 3                      | 55 (49.7–59.9)                      | 42                       | 55.7 (47.6–63)              | 48                  | 52.5 (45.8–58.7)            | <0.001           |
| 4                      | 48.9 (42.7–54.8)                    | 22                       | 43.8 (33.7–53.5)            | 36                  | 51.1 (44–57.7)              | <0.001           |
| 5                      | 46.1 (39.5–52.5)                    | 15                       | 38.8 (27.8–49.6)            | 27                  | 49.6 (42.2–56.6)            | <0.001           |
| 6                      | 42.3 (35–49.4)                      | 12                       | 35.6 (24.1–47.2)            | 21                  | 45.5 (36.7–53.8)            | <0.001           |
| 10                     | 24.2 (13.4–36.7)                    | 1                        | N/A                         | 5                   | 30.3 (16.7–45.1)            | <0.001           |

*HD*, hemodialysis; *KRT*, kidney replacement therapy; *N/A*, not available; *PD*, peritoneal dialysis



Table S16. Non-censored for death technique survival among children receiving dialysis (PD and HD) as the first KRT modality, by decade

| Period /<br>first KRT modality | Technique survival probability (95% CI) |                  |                  |                  |                  |
|--------------------------------|-----------------------------------------|------------------|------------------|------------------|------------------|
|                                | 6 months                                | 1 year           | 2 years          | 5 years          | 10 years         |
| 2000–2010                      |                                         |                  |                  |                  |                  |
| Overall                        | 81.4 (77.7–84.5)                        | 76.6 (72.6–80.1) | 67 (62.1–71.3)   | 57.6 (51.9–62.9) | 46.4 (39.9–52.6) |
| Peritoneal dialysis            | 89.8 (85.1–93)                          | 83.8 (78–88.1)   | 63.4 (54.7–70.8) | 36.2 (22.9–49.7) | N/A              |
| Hemodialysis                   | 63.6 (56.1–70.1)                        | 59.2 (51.5–66.1) | 55.2 (47–62.6)   | 48.4 (38.7–57.3) | 31.1 (17.1–46.1) |
| 2011–2020                      |                                         |                  |                  |                  |                  |
| Overall                        | 82.9 (79.3–85.9)                        | 78.9 (74.8–82.3) | 73.6 (68.8–77.8) | 65.8 (59.4–71.4) | N/A              |
| Peritoneal dialysis            | 90 (85.5–93.2)                          | 82.3 (76.4–86.9) | 70.9 (62.3–78)   | 42.4 (24.2–59.5) | N/A              |
| Hemodialysis                   | 61.2 (52.8–68.5)                        | 59.9 (51.2–67.4) | 56.1 (46.3–64.8) | 53.1 (42.2–52.9) | N/A              |

*HD*, hemodialysis; *KRT*, kidney replacement therapy; *N/A*, not available; *PD*, peritoneal dialysis

Table S17. Multivariable Cox proportional hazards analysis of non-censored for death technique failure among children receiving dialysis modalities (PD and HD) as the first KRT: Australia and New Zealand Registry 2000–2020

| Parameter                               | Multivariable-adjusted hazard ratio (95% CI) for Australia only | Multivariable-adjusted hazard ratio (95% CI) for Australia and New Zealand |
|-----------------------------------------|-----------------------------------------------------------------|----------------------------------------------------------------------------|
| Period                                  |                                                                 |                                                                            |
| 2011–2020 vs. 2000–2010                 | 1 (0.7–1.3)                                                     | 1 (0.8–1.3)                                                                |
| Age at KRT                              |                                                                 |                                                                            |
| 5–9 vs. 0–4 years old                   | 1 (0.7–1.6)                                                     | 1.1 (0.8–1.6)                                                              |
| 10–14 vs. 0–4 years old                 | 0.5 (0.4–0.8)*                                                  | 0.6 (0.4–0.9)*                                                             |
| 15–18 vs. 0–4 years old                 | 0.6 (0.4–0.8)*                                                  | 0.6 (0.4–0.8)*                                                             |
| Gender                                  |                                                                 |                                                                            |
| Female vs. male                         | 1.1 (0.8–1.5)                                                   | 1.2 (0.9–1.5)                                                              |
| Ethnicity                               |                                                                 |                                                                            |
| Asian vs. Caucasian                     | 0.8 (0.5–1.3)                                                   | 0.8 (0.5–1.2)                                                              |
| ATSI* vs. Caucasian                     | 1 (0.6–1.6)                                                     | 1.1 (0.7–1.8)                                                              |
| Māori vs. Caucasian                     | 1.5 (0.5–4.9)                                                   | 1.3 (0.8–2.1)                                                              |
| Pacific Islander vs. Caucasian          | 0.9 (0.5–1.9)                                                   | 1.1 (0.7–1.7)                                                              |
| Other vs. Caucasian                     | 1 (0.6–1.6)                                                     | 1 (0.7–1.6)                                                                |
| First KRT modality                      |                                                                 |                                                                            |
| Hemodialysis vs. PD                     | 2.4 (1.8–3.3)*                                                  | 2.2 (1.6–2.9)*                                                             |
| Primary kidney diseases                 |                                                                 |                                                                            |
| Cystic diseases vs. CAKUT               | 0.9 (0.5–1.6)                                                   | 0.9 (0.5–1.4)                                                              |
| Glomerulonephritis vs. CAKUT            | 1.7 (1.2–2.4)*                                                  | 1.5 (1.1–2)*                                                               |
| Others vs. CAKUT                        | 1.1 (0.8–1.6)                                                   | 1 (0.7–1.3)                                                                |
| Late referral                           | 1.8 (1.4–2.5)*                                                  | 1.6 (1.3–2.1)*                                                             |
| Parent centre state                     |                                                                 |                                                                            |
| New Zealand vs. Australia               |                                                                 | 0.8 (0.6–1.2)                                                              |
| Socio economic indexes for Area (IRSAD) |                                                                 |                                                                            |
| Quartile 2 vs. quartile 1               | 0.9 (0.6–1.4)                                                   | N/A                                                                        |
| Quartile 3 vs. quartile 1               | 1 (0.6–1.4)                                                     | N/A                                                                        |
| Quartile 4 vs. quartile 1               | 0.9 (0.6–1.4)                                                   | N/A                                                                        |

|                                                     |               |     |
|-----------------------------------------------------|---------------|-----|
| Accessibility/Remoteness Index of Australia (ARIA), |               |     |
| Regional vs. major                                  | 1.1 (0.7–1.5) | N/A |
| Remote vs. major                                    | 1.7 (0.8–3.6) | N/A |

*ATSI*, Aboriginal and Torres Strait Islander; *CAKUT*, congenital anomalies of the kidneys and urinary tract; *HD*, hemodialysis; *KRT*, kidney replacement therapy; *KT*, kidney transplantation; *N/A*, not available; *PD*, peritoneal dialysis

\*statistically significant

Data from New Zealand alone was too limited to be shown separately.

Table S18. Comparison of death-censored graft survival among children receiving first KT, stratified by the first KRT modality: Australia and New Zealand Registry 2000–2020

| Follow-up time (years) | Overall patient survival (95% CI) | Peritoneal dialysis |                           | Hemodialysis        |                           | Pre-emptive KT      |                           | Log-rank P value |
|------------------------|-----------------------------------|---------------------|---------------------------|---------------------|---------------------------|---------------------|---------------------------|------------------|
|                        |                                   | N at risk in cohort | Patient survival (95% CI) | N at risk in cohort | Patient survival (95% CI) | N at risk in cohort | Patient survival (95% CI) |                  |
| 0.5                    | 97.4 (96.1–98.2)                  | 404                 | 98.1 (96.3–99.1)          | 284                 | 96.3 (93.5–97.9)          | 182                 | 97.4 (93.8–98.9)          | N/A              |
| 1                      | 96.7 (95.3–97.7)                  | 395                 | 97.6 (95.6–98.7)          | 277                 | 95.6 (92.6–97.4)          | 175                 | 96.3 (92.3–98.2)          | 0.65             |
| 5                      | 86.5 (83.9–88.7)                  | 262                 | 87.1 (83.1–90.2)          | 186                 | 82.4 (77.2–86.5)          | 129                 | 91.8 (86.5–95.1)          | 0.03             |
| 10                     | 70.7 (66.8–74.2)                  | 130                 | 72.3 (66.4–77.3)          | 81                  | 62.9 (55.6–69.3)          | 70                  | 79.4 (71.2–85.6)          | 0.04             |
| 15                     | 53.2 (47.8–58.2)                  | 46                  | 50.6 (42.1–58.4)          | 29                  | 49.1 (39.9–57.6)          | 31                  | 64.5 (53.2–73.7)          | 0.07             |
| 20                     | 40.2 (31.1–49.1)                  | 3                   | 27.7 (12.9–44.7)          | 2                   | 46.3 (36.2–55.9)          | 8                   | 54.1 (39.1–66.9)          | 0.05             |

*KRT*, kidney replacement therapy; *KT*, kidney transplantation; *N/A*, not available

Table S19. Death-censored graft survival among children receiving pre-emptive kidney transplantation, by decade

| Period    | Technique survival probability (95% CI) |                  |                  |                  |                  |
|-----------|-----------------------------------------|------------------|------------------|------------------|------------------|
|           | 6 months                                | 1 year           | 2 years          | 5 years          | 10 years         |
| 2000–2010 | 96.7 (90.0–98.9)                        | 94.4 (87.2–97.7) | 93.3 (85.8–97.0) | 89.0 (80.3–93.9) | 76.7 (66.5–84.1) |
| 2011–2020 | 98.0 (92.3–99.5)                        | 98.0 (92.2–99.5) | 98.0 (92.2–99.5) | 95.2 (87.5–98.2) | N/A              |
| P value   | 0.09                                    | 0.08             | 0.02             | 0.00             |                  |

N/A, not available

## Supplementary Figures

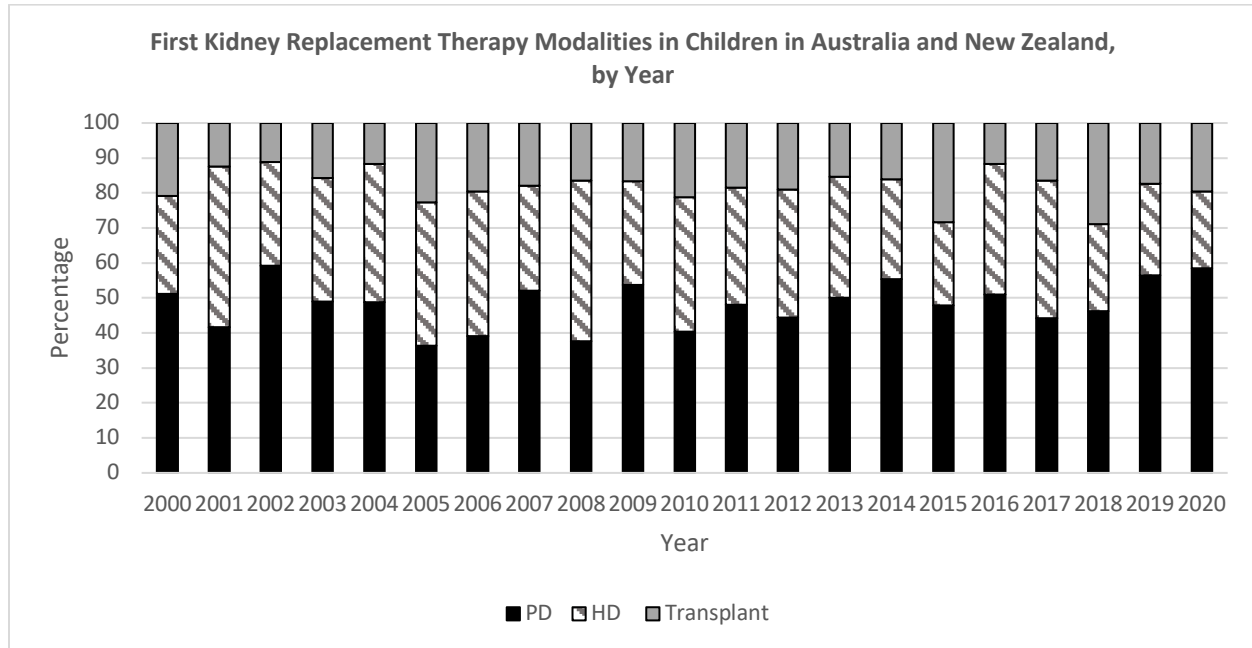

Figure S1. Proportion of the first KRT modalities in children (0–18 years old) in Australia and New Zealand, 2000–2020, by year. *HD*, hemodialysis; *KRT*, kidney replacement therapy; *KT*, kidney transplantation; *PD*, peritoneal dialysis

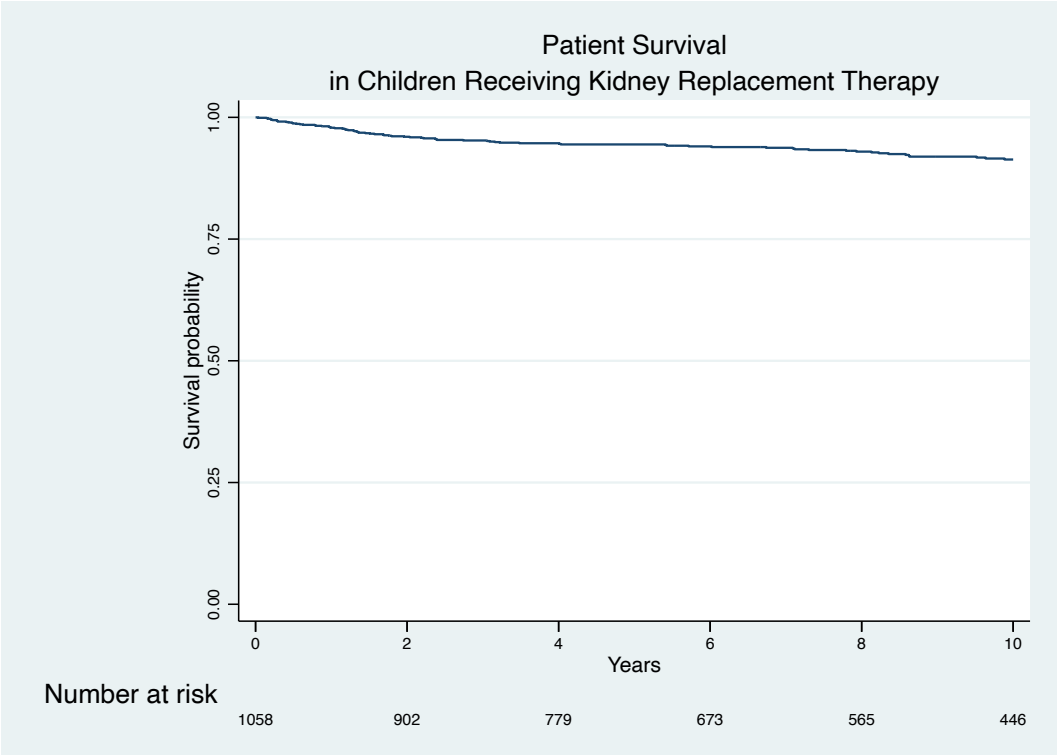

Figure S2. Overall patient survival in children receiving the first KRT modality. *KRT*, kidney replacement therapy

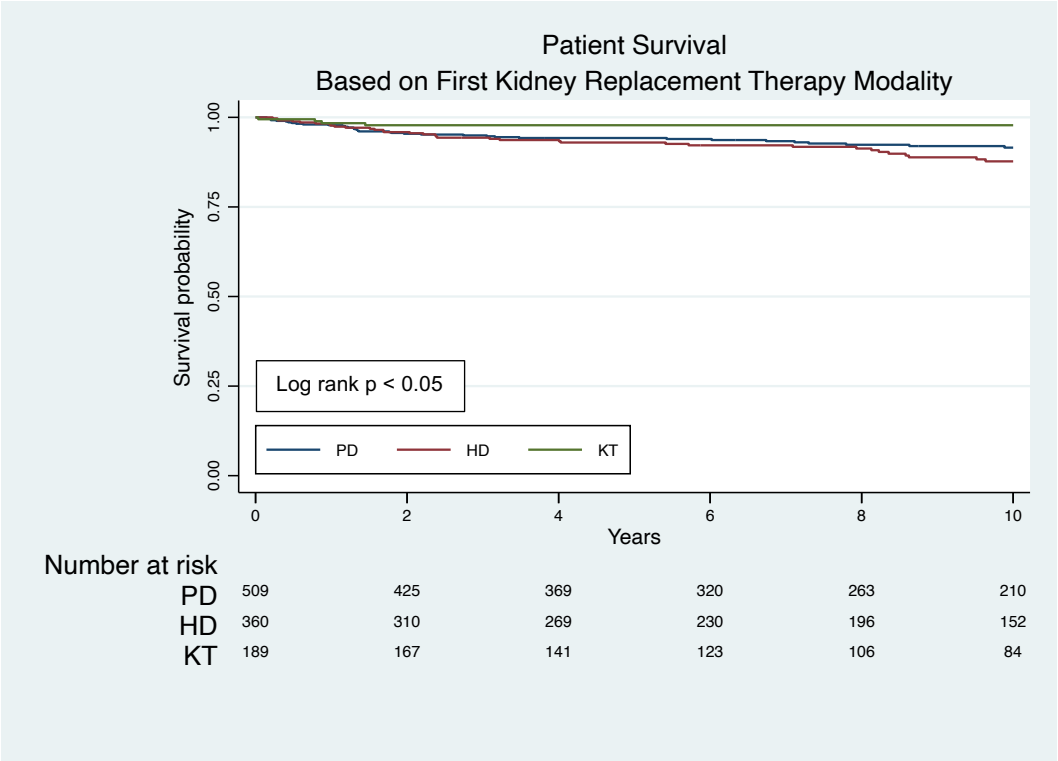

Figure S3. Patient survival in children based on first KRT modality, log rank  $p < 0.007$ . *HD*, hemodialysis; *KRT*, kidney replacement therapy; *KT*, kidney transplantation; *PD*, peritoneal dialysis



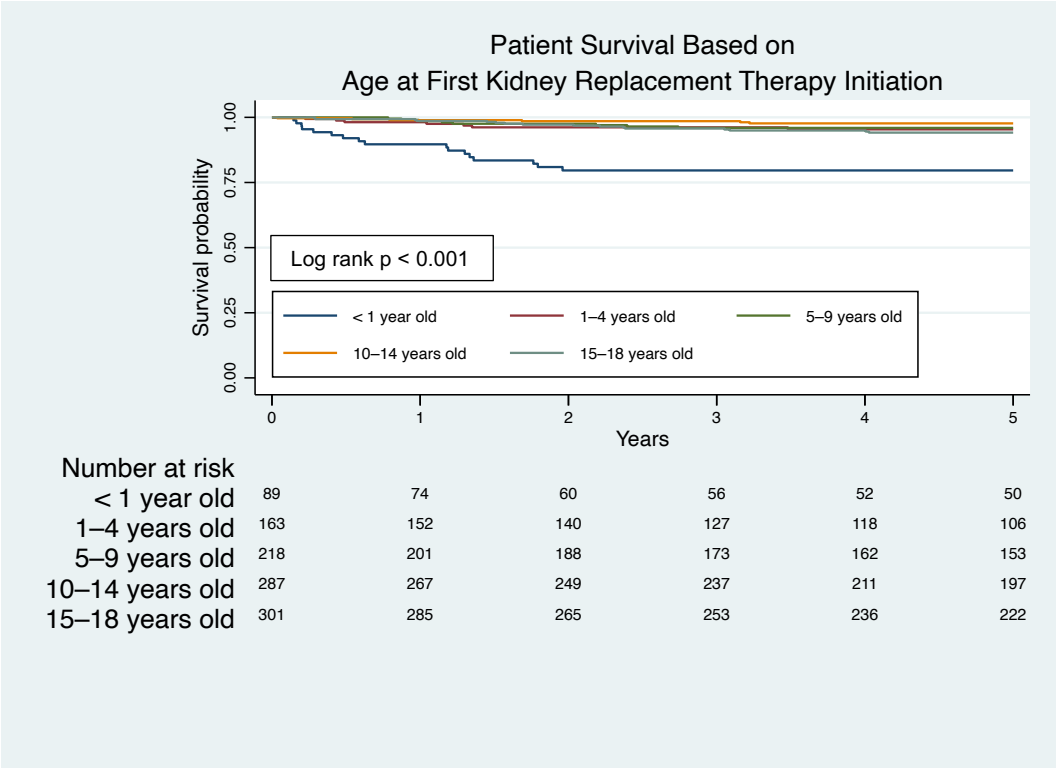

Figure S4. Patient survival in children receiving KRT based on age at KRT initiation, log rank  $p < 0.001$ . *KRT*, kidney replacement therapy

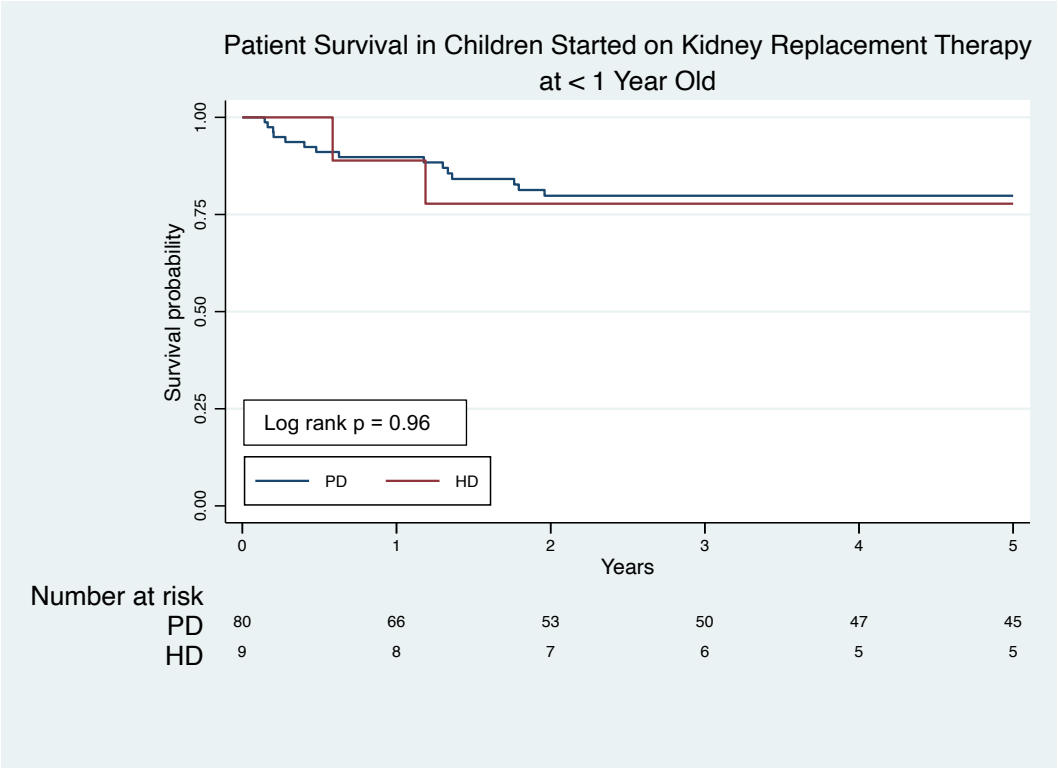

Figure S5. Patient survival in children started on KRT at < 1 year old, log rank p = 0.96. *HD*, hemodialysis; *KRT*, kidney replacement therapy; *PD*, peritoneal dialysis

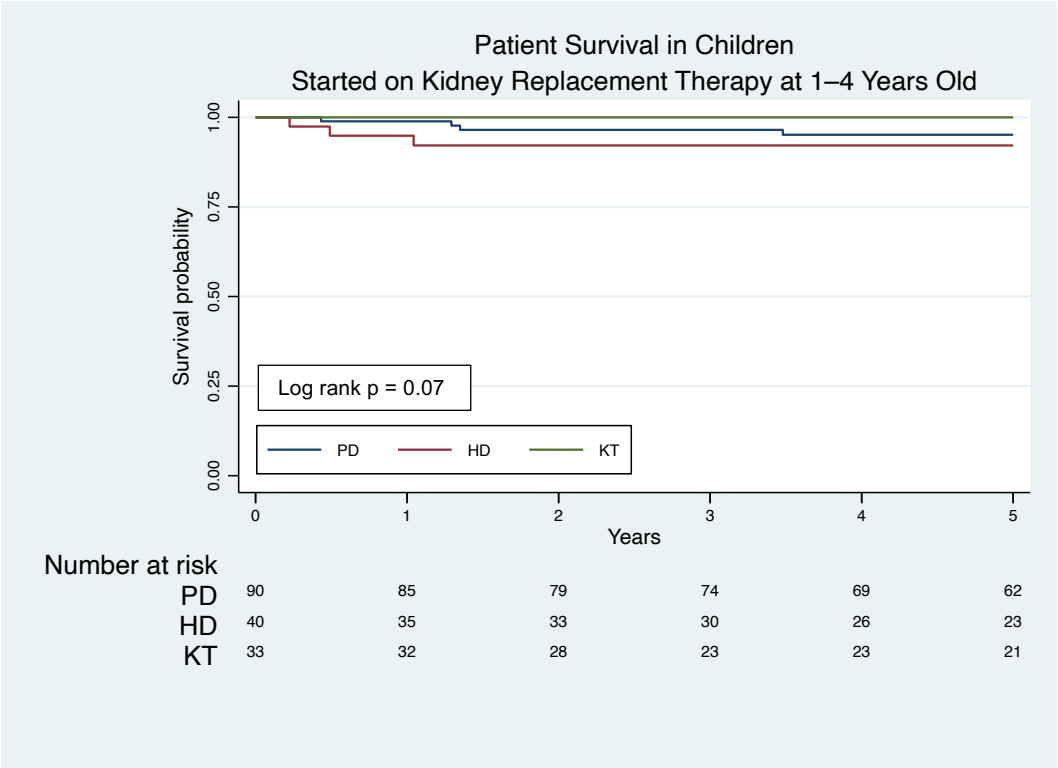

Figure S6. Patient survival in children started on KRT at 1–4 years old, log rank  $p = 0.07$ . *HD*, hemodialysis; *KRT*, kidney replacement therapy; *PD*, peritoneal dialysis

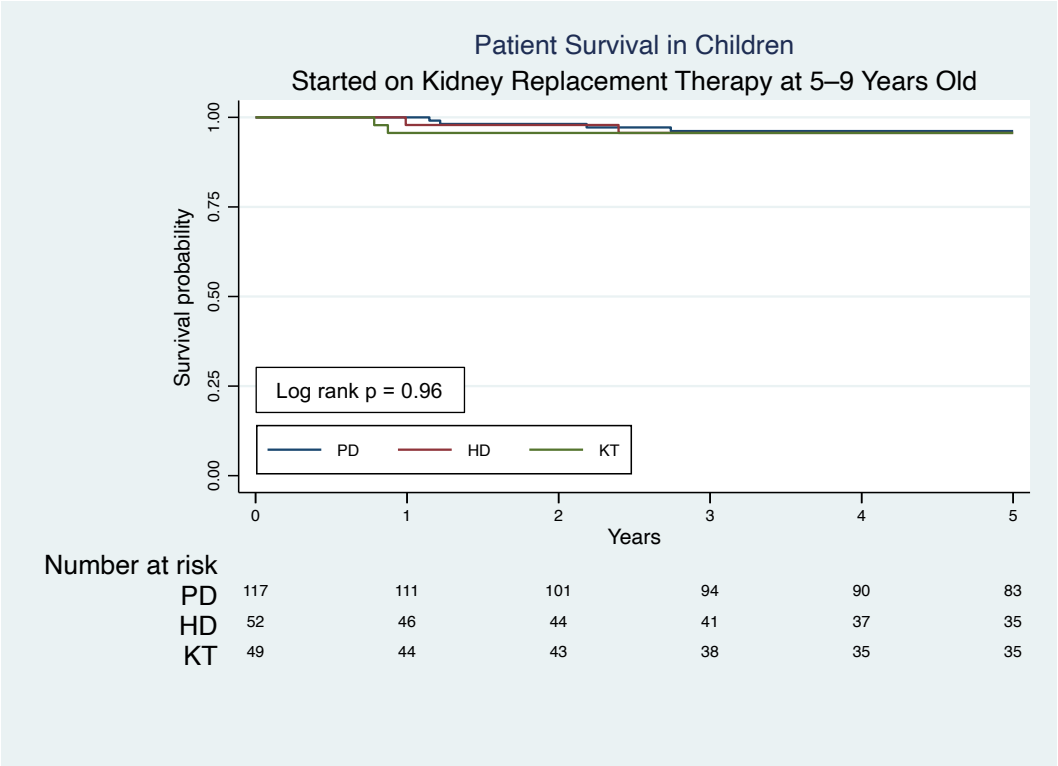

Figure S7. Patient survival in children started on KRT at 5–9 years old, log rank  $p = 0.96$ . *HD*, hemodialysis; *KRT*, kidney replacement therapy; *PD*, peritoneal dialysis

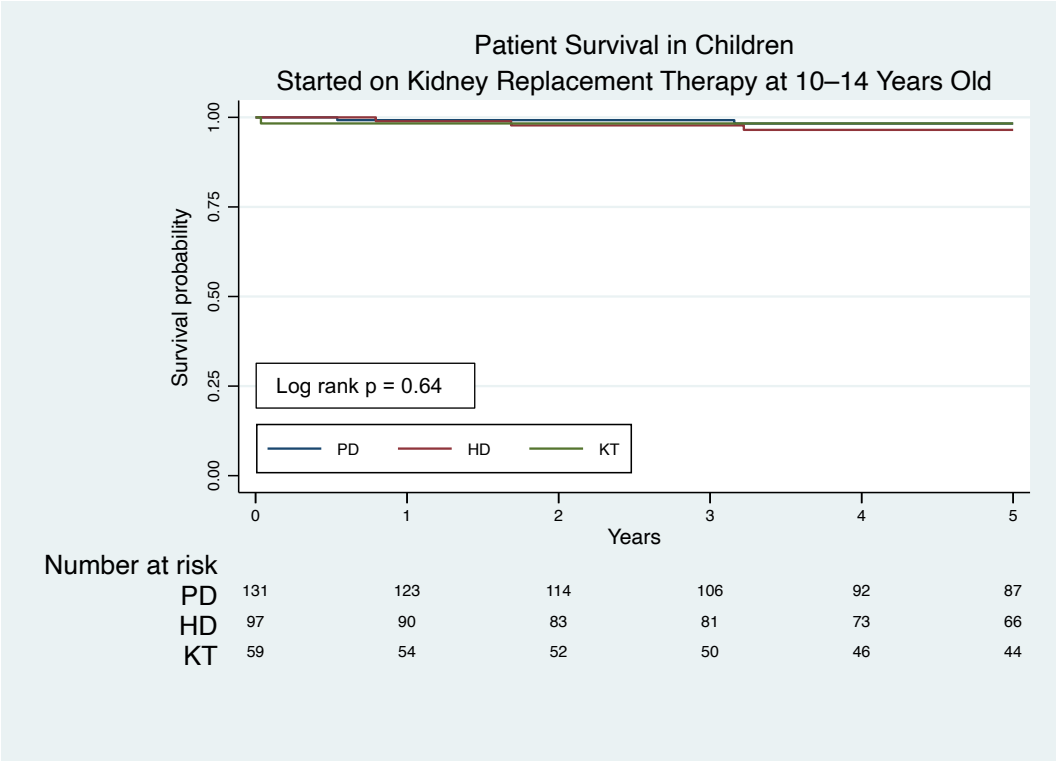

Figure S8. Patient survival in children started on KRT at 10–14 years old, log rank  $p = 0.64$ . *HD*, hemodialysis; *KRT*, kidney replacement therapy; *PD*, peritoneal dialysis

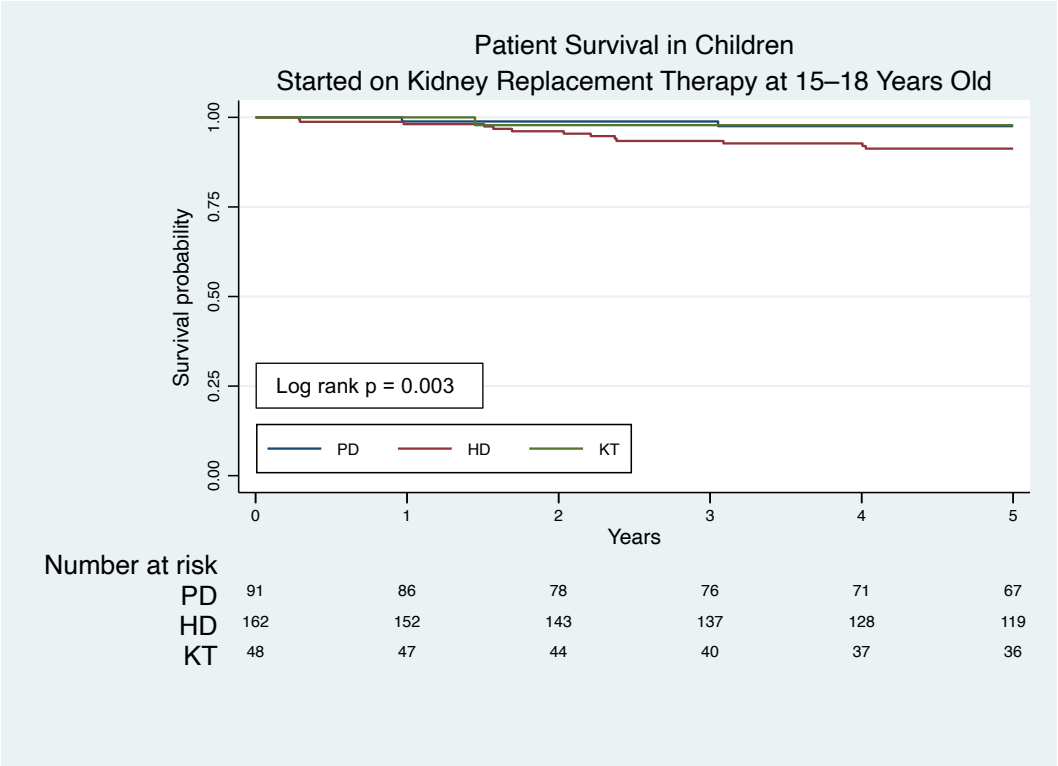

Figure S9. Patient survival in children started on KRT at 15–18 years old, log rank  $p = 0.0033$ . *HD*, hemodialysis; *KRT*, kidney replacement therapy; *PD*, peritoneal dialysis

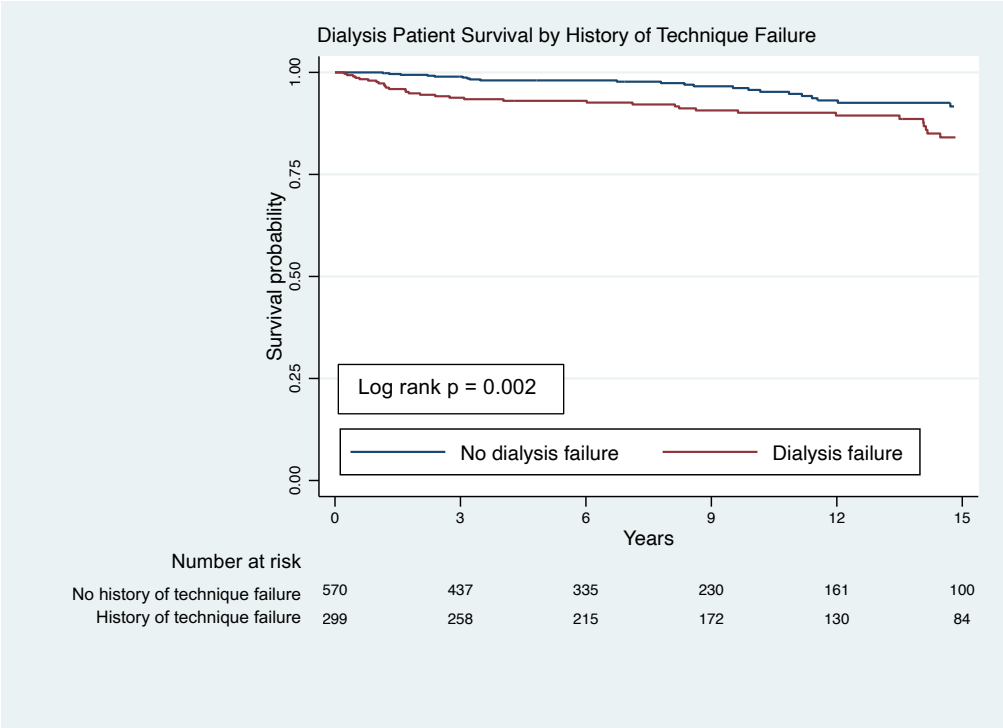

Figure S10. Dialysis patient survival related with history of technique failure (among all patients receiving PD and HD as the first KRT modality). *HD*, hemodialysis; *KRT*, kidney replacement therapy; *PD*, peritoneal dialysis

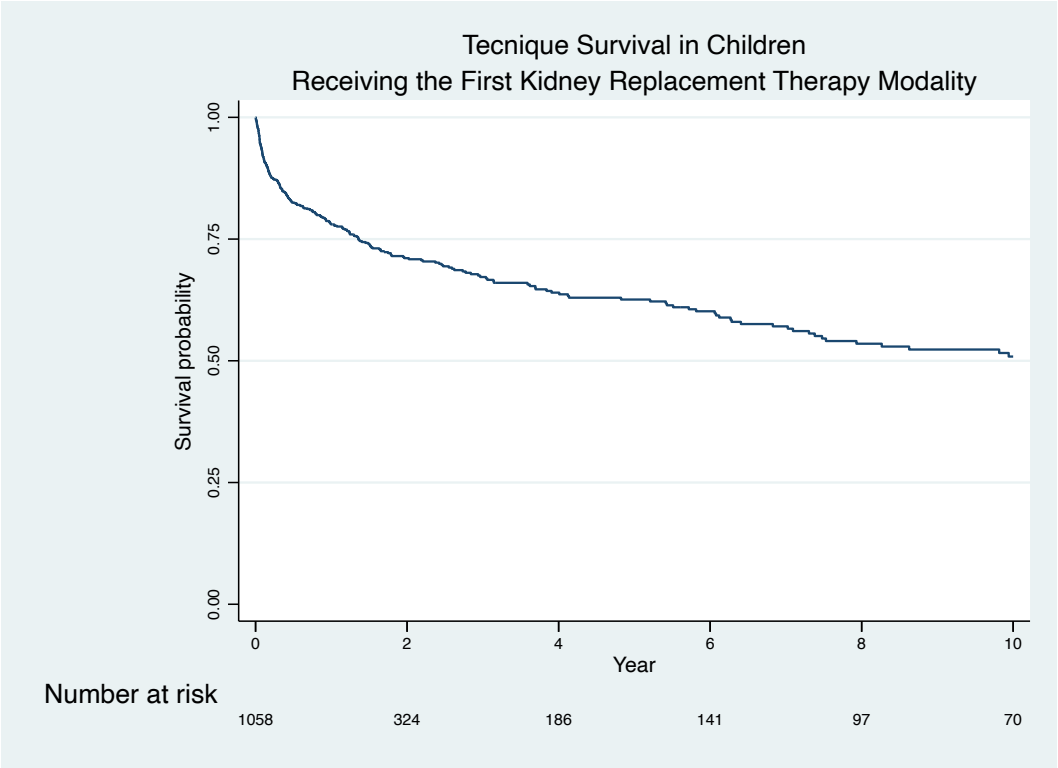

Figure S11. Overall technique survival in children receiving the first KRT modality. *KRT*, kidney replacement therapy



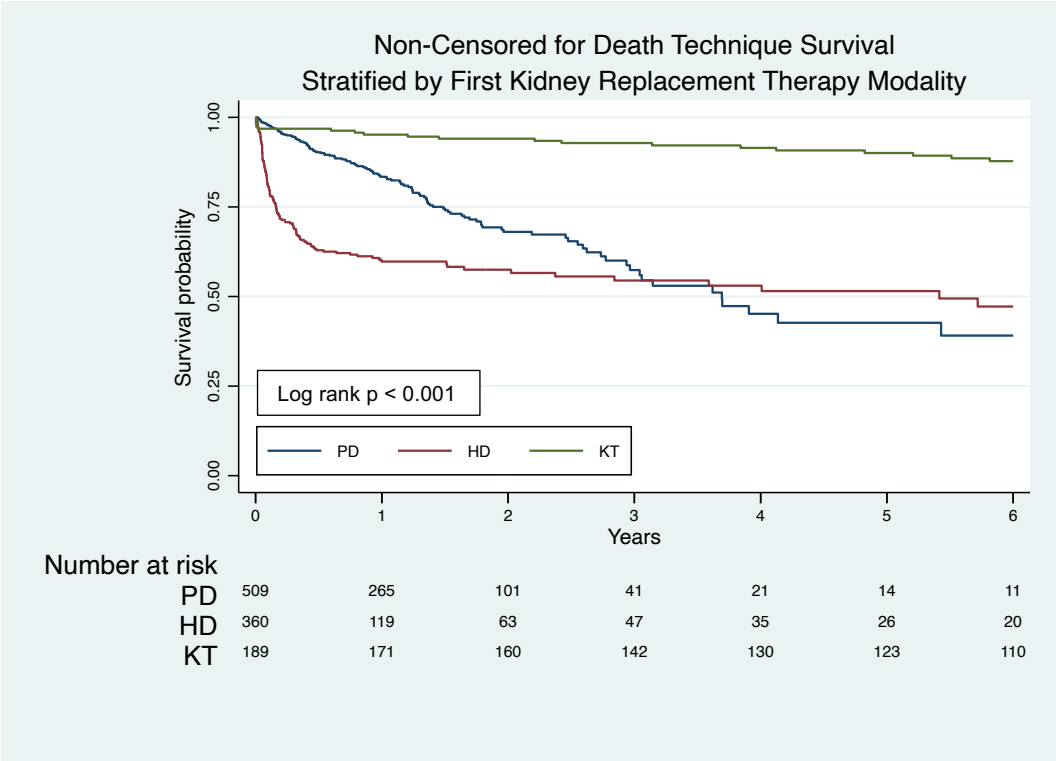

Figure S12. Non-censored for death technique survival stratified by the first KRT modality, log rank  $p < 0.001$ . *HD*, hemodialysis; *KRT*, kidney replacement therapy; *KT*, kidney transplantation; *PD*, peritoneal dialysis

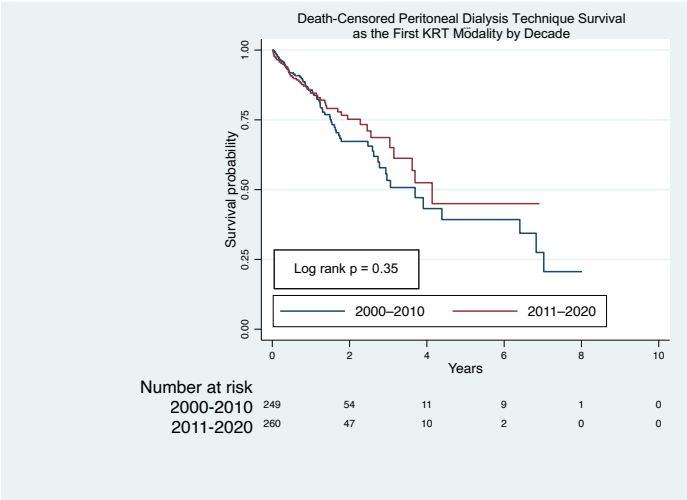

Figure S13. Death-censored PD technique survival as the first KRT modality by decade, log rank  $p = 0.35$ . *KRT*, kidney replacement therapy; *PD*, peritoneal dialysis

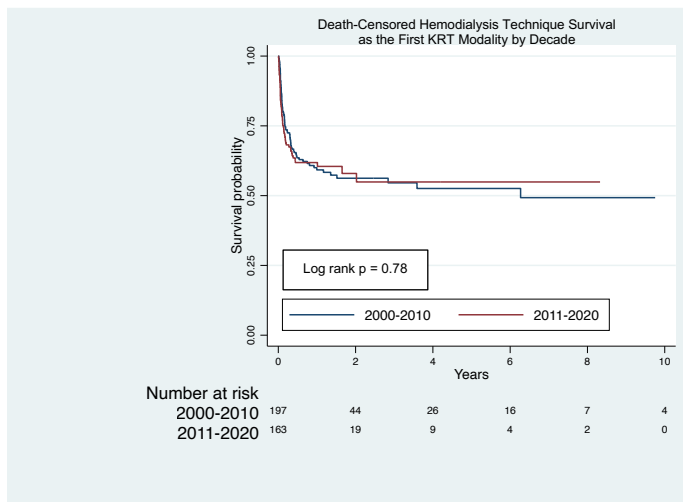

Figure S14. Death-censored HD technique survival as the first KRT modality by decade, log rank  $p = 0.78$ . *HD*, hemodialysis; *KRT*, kidney replacement therapy

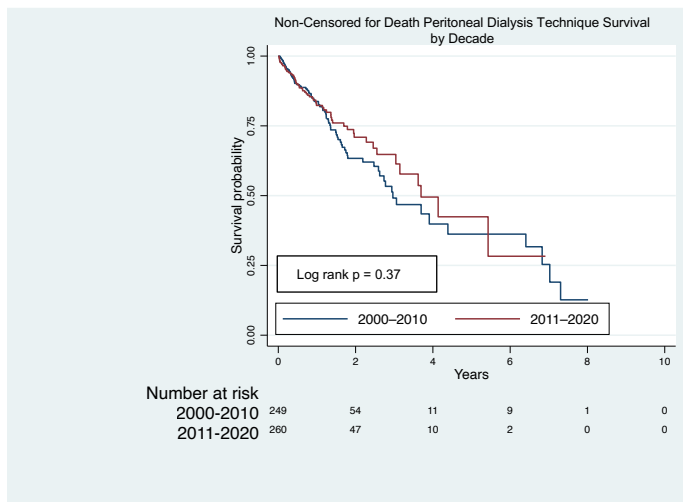

Figure S15. Non-censored for death PD technique survival by decade, log rank  $p = 0.37$ . *KRT*, kidney replacement therapy; *PD*, peritoneal dialysis

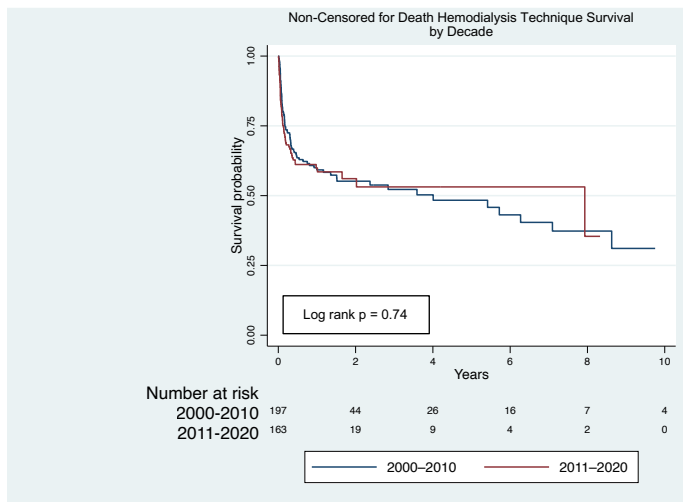

Figure S16. Non-censored for death HD technique survival by decade, log rank  $p = 0.74$ . *HD*, hemodialysis; *KRT*, kidney replacement therapy

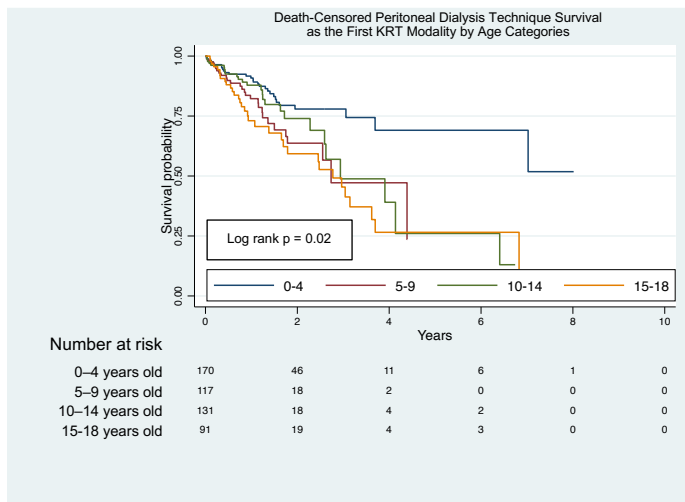

Figure S17. Death-censored PD technique survival as the first KRT modality by age categories, log rank  $p = 0.02$ . *KRT*, kidney replacement therapy; *PD*, peritoneal dialysis

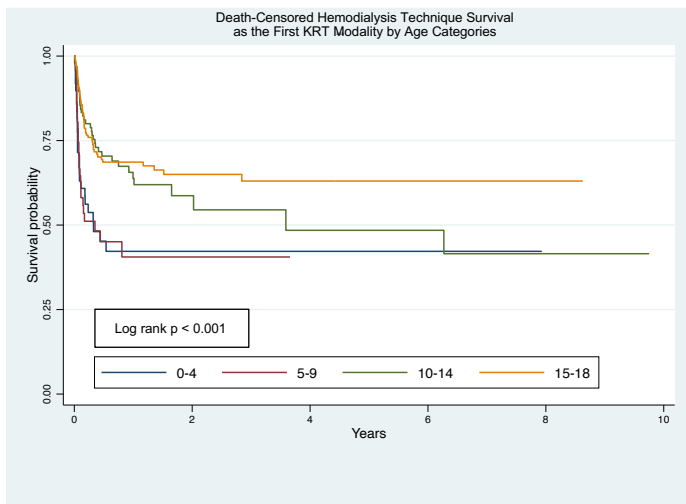

Figure S18. Death-censored HD technique survival as the first KRT modality by age categories, log rank  $p < 0.001$ . *HD*, hemodialysis

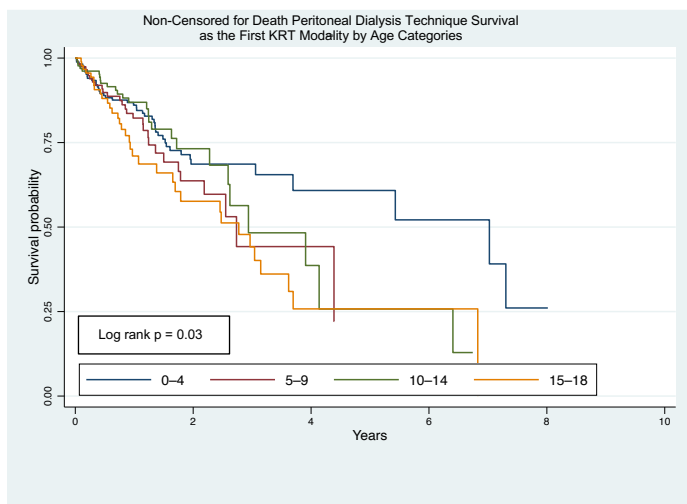

Figure S19. Non censored for death PD technique survival for PD as the first KRT modality by age categories, log rank  $p = 0.03$ . *KRT*, kidney replacement therapy; *PD*, peritoneal dialysis



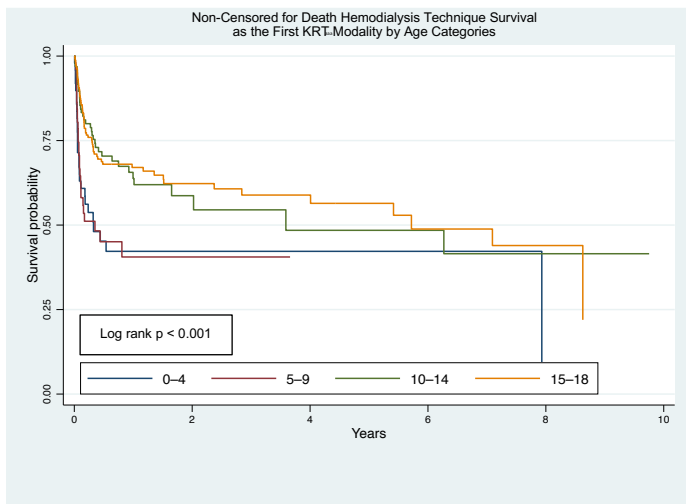

Figure S20. Non-censored for death HD technique survival for HD as the first KRT modality by age categories , log rank  $p < 0.001$ . *HD*, hemodialysis; *KRT*, kidney replacement therapy;

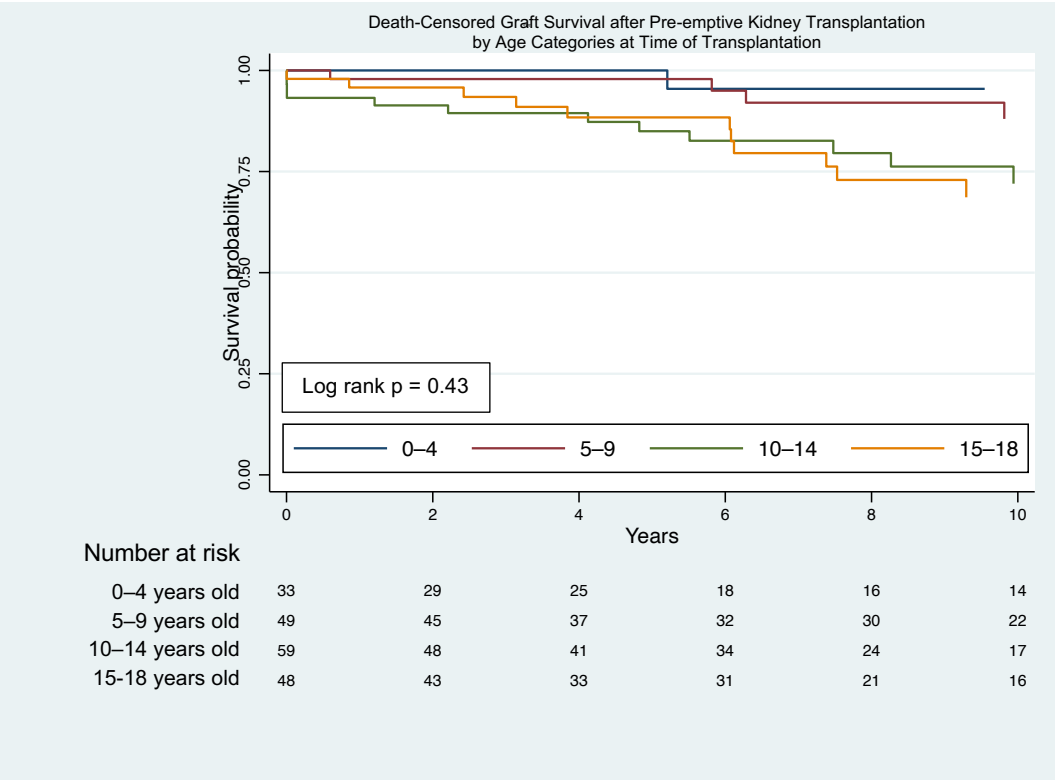

Figure S21. Death-censored graft survival by age categories at time of transplantation, log rank p = 0.43. *KT*, kidney transplantation

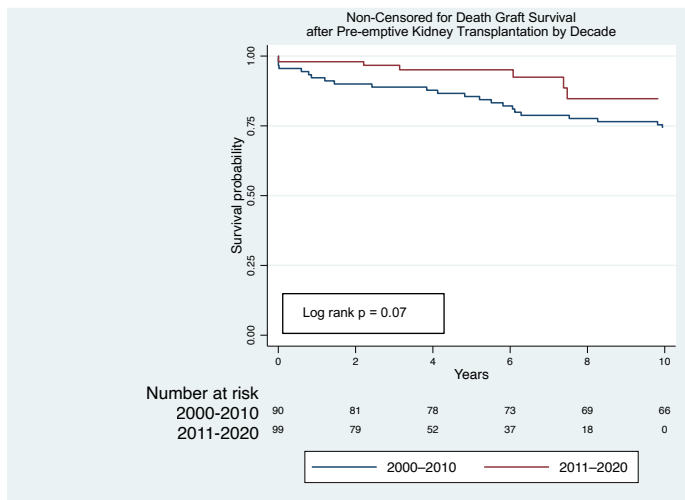

Figure S22. Non-censored for death graft survival after pre-emptive KT by decade, log rank  $p = 0.07$ . *KRT*, kidney replacement therapy; *KT*, kidney transplantation

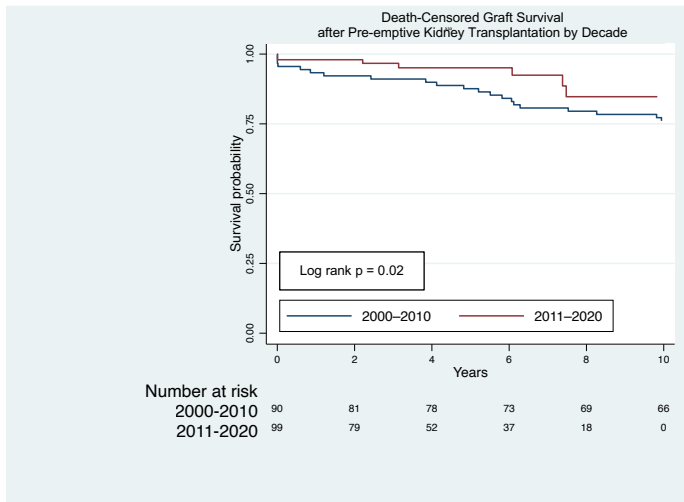

Figure S23. Death-censored graft survival after pre-emptive KT by decade. *KRT*, kidney replacement therapy; *KT*, kidney transplantation

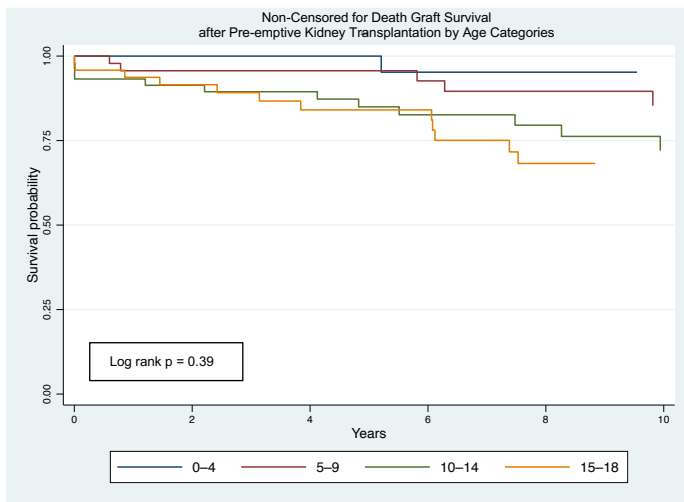

Figure S24. Non-censored for death graft survival after pre-emptive KT by age categories at time of transplantation, log rank  $p = 0.39$ . *KT*, kidney transplantation

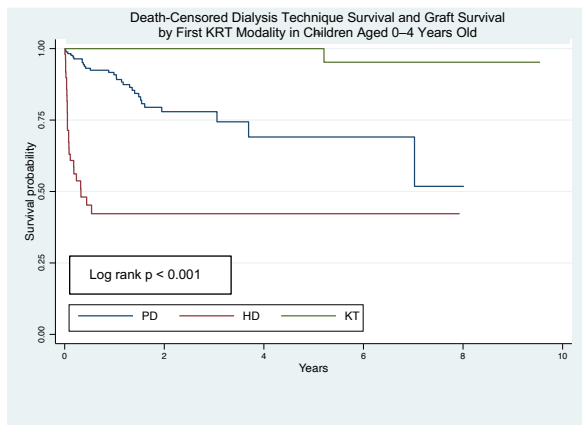

Figure S25. Death-censored dialysis technique survival and graft survival stratified by first KRT modality in children aged 0–4 years old, log rank  $p < 0.001$ . *HD*, hemodialysis; *KRT*, kidney replacement therapy; *KT*, kidney transplantation; *PD*, peritoneal dialysis

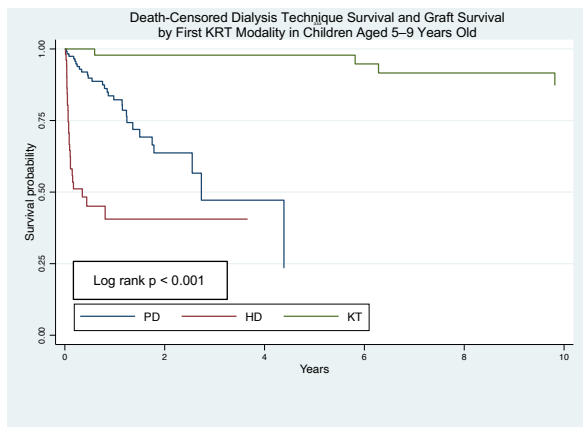

Figure S26. Death-censored dialysis technique survival and graft survival stratified by first KRT modality in children aged 5–9 years old, log rank  $p < 0.001$ . *HD*, hemodialysis; *KRT*, kidney replacement therapy; *KT*, kidney transplantation; *PD*, peritoneal dialysis

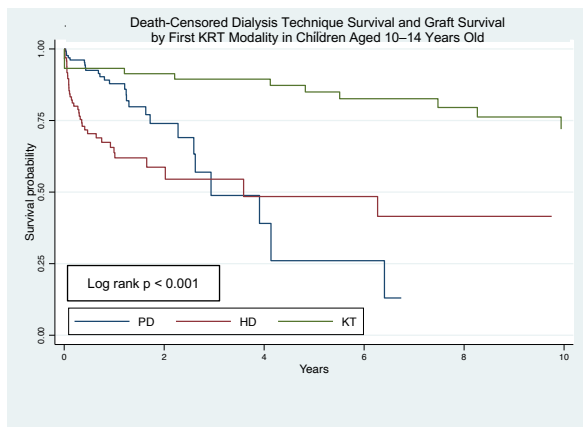

Figure S27. Death-censored dialysis technique survival and graft survival stratified by first KRT modality in children aged 10–14 years old, log rank  $p < 0.001$ . *HD*, hemodialysis; *KRT*, kidney replacement therapy; *KT*, kidney transplantation; *PD*, peritoneal dialysis



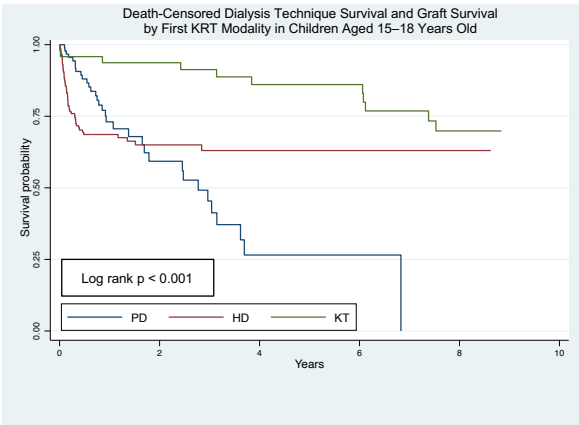

Figure S28. Death-censored dialysis technique survival and graft survival stratified by first KRT modality in children aged 15–18 years old, log rank  $p < 0.001$

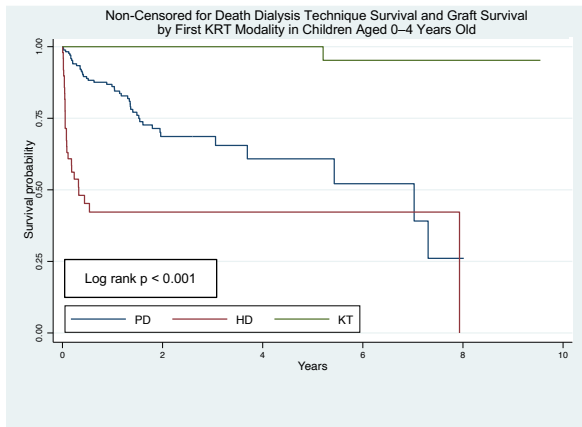

Figure S29. Non-censored for death dialysis technique survival and graft survival stratified by first KRT modality in children aged 0–4 years old, log rank  $p < 0.001$

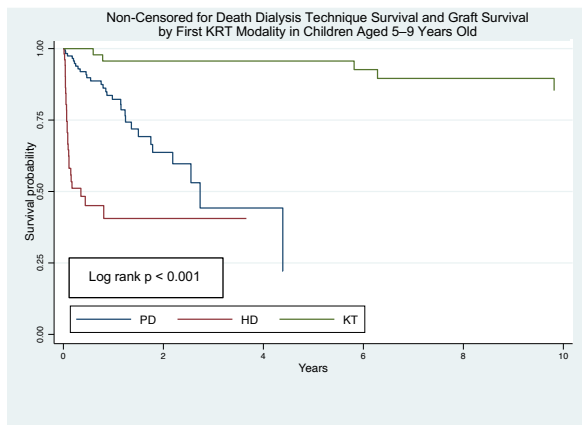

Figure S30. Non-censored for death dialysis technique survival and graft survival stratified by first KRT modality in children aged 5–9 years old, log rank  $p < 0.001$ . *HD*, hemodialysis; *KRT*, kidney replacement therapy; *KT*, kidney transplantation; *PD*, peritoneal dialysis

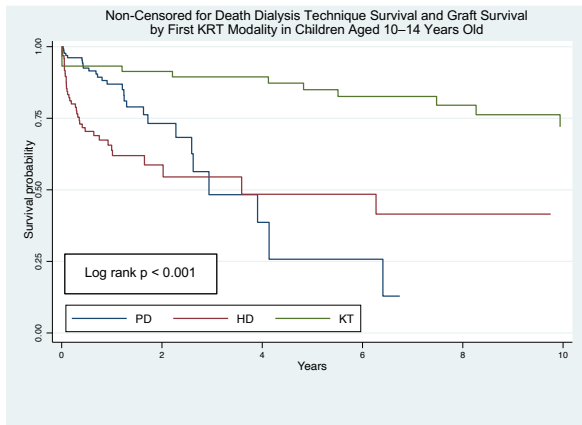

Figure S31. Non-censored for death dialysis technique survival and graft survival stratified by first KRT modality in children aged 10–14 years old, log rank  $p < 0.001$ . *HD*, hemodialysis; *KRT*, kidney replacement therapy; *KT*, kidney transplantation; *PD*, peritoneal dialysis

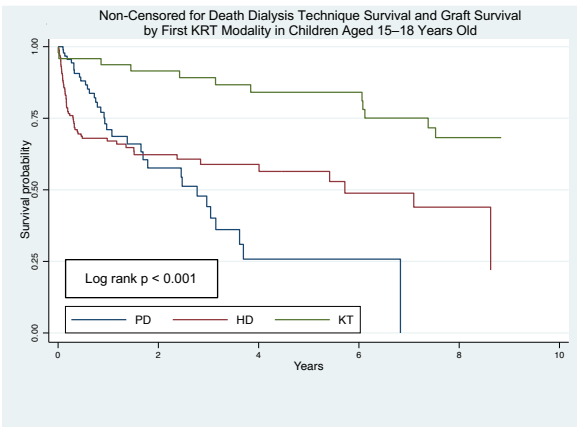

Figure S32. Non-censored for death dialysis technique survival and graft survival stratified by first KRT modality in children aged 15–18 years old, log rank  $p < 0.001$ . *HD*, hemodialysis; *KRT*, kidney replacement therapy; *KT*, kidney transplantation; *PD*, peritoneal dialysis
